# Supplementary material for: Mapping Immune Correlates and Surfaceome Genes in BRAF Mutated Colorectal Cancers
Source: MDPI journal article supplement (doi:10.3390/curroncol30030196), 2023-02-21
Supplement: s1 [file s1]

Supplementary Figure S1

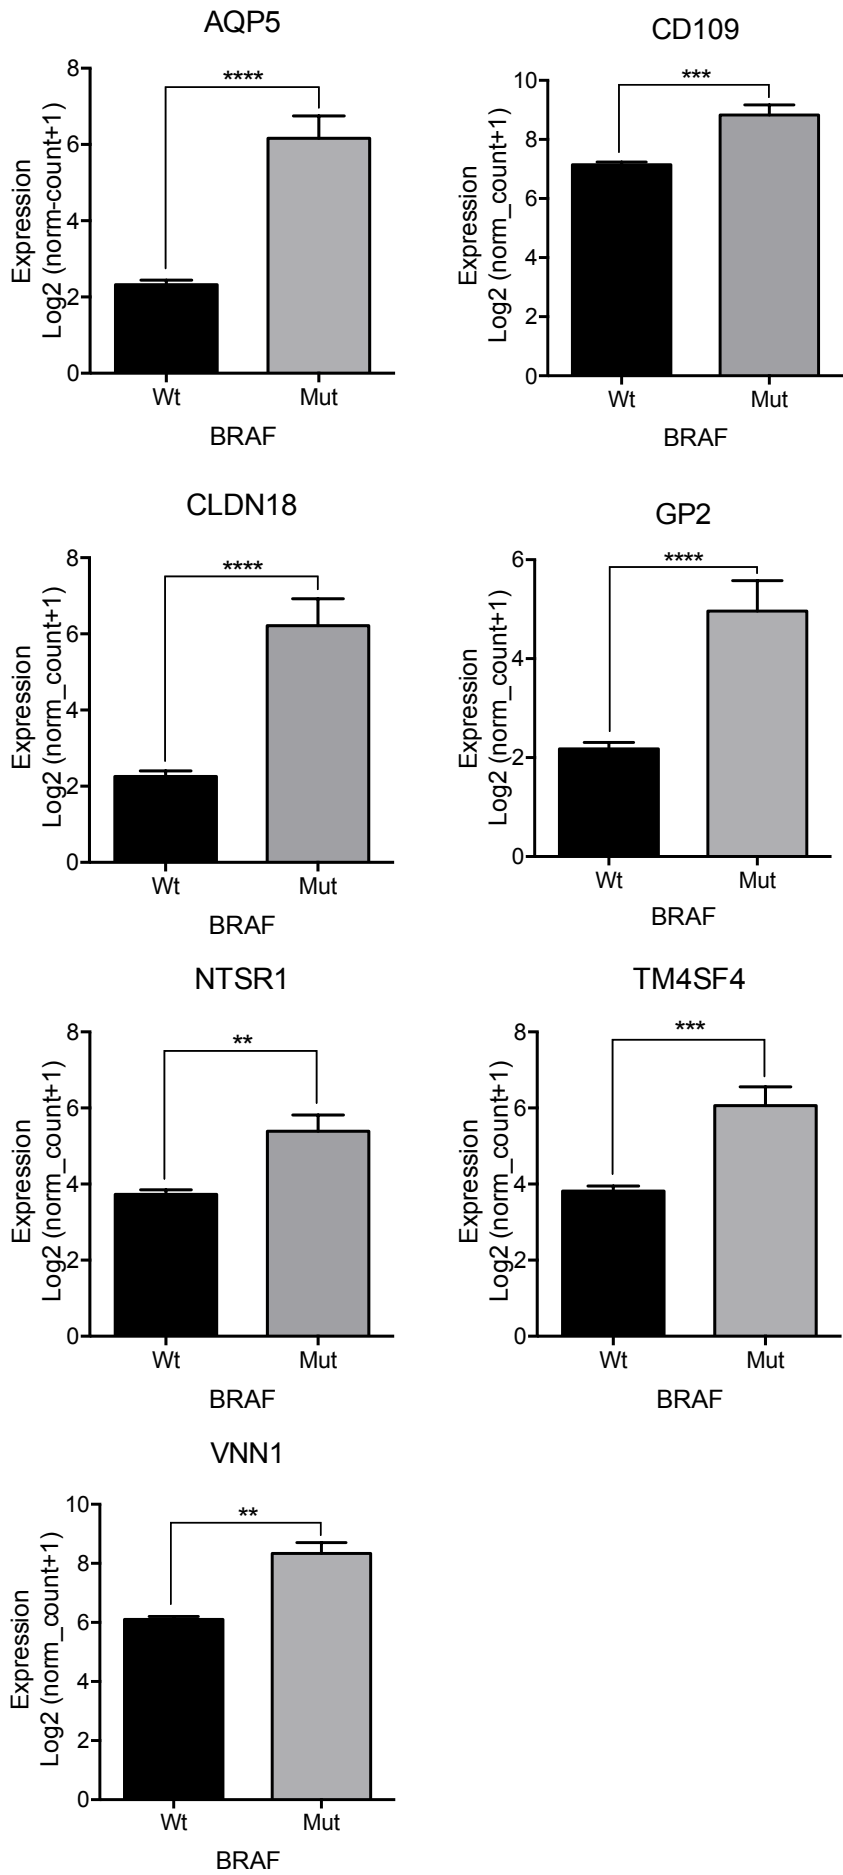

Supplementary Figure S2

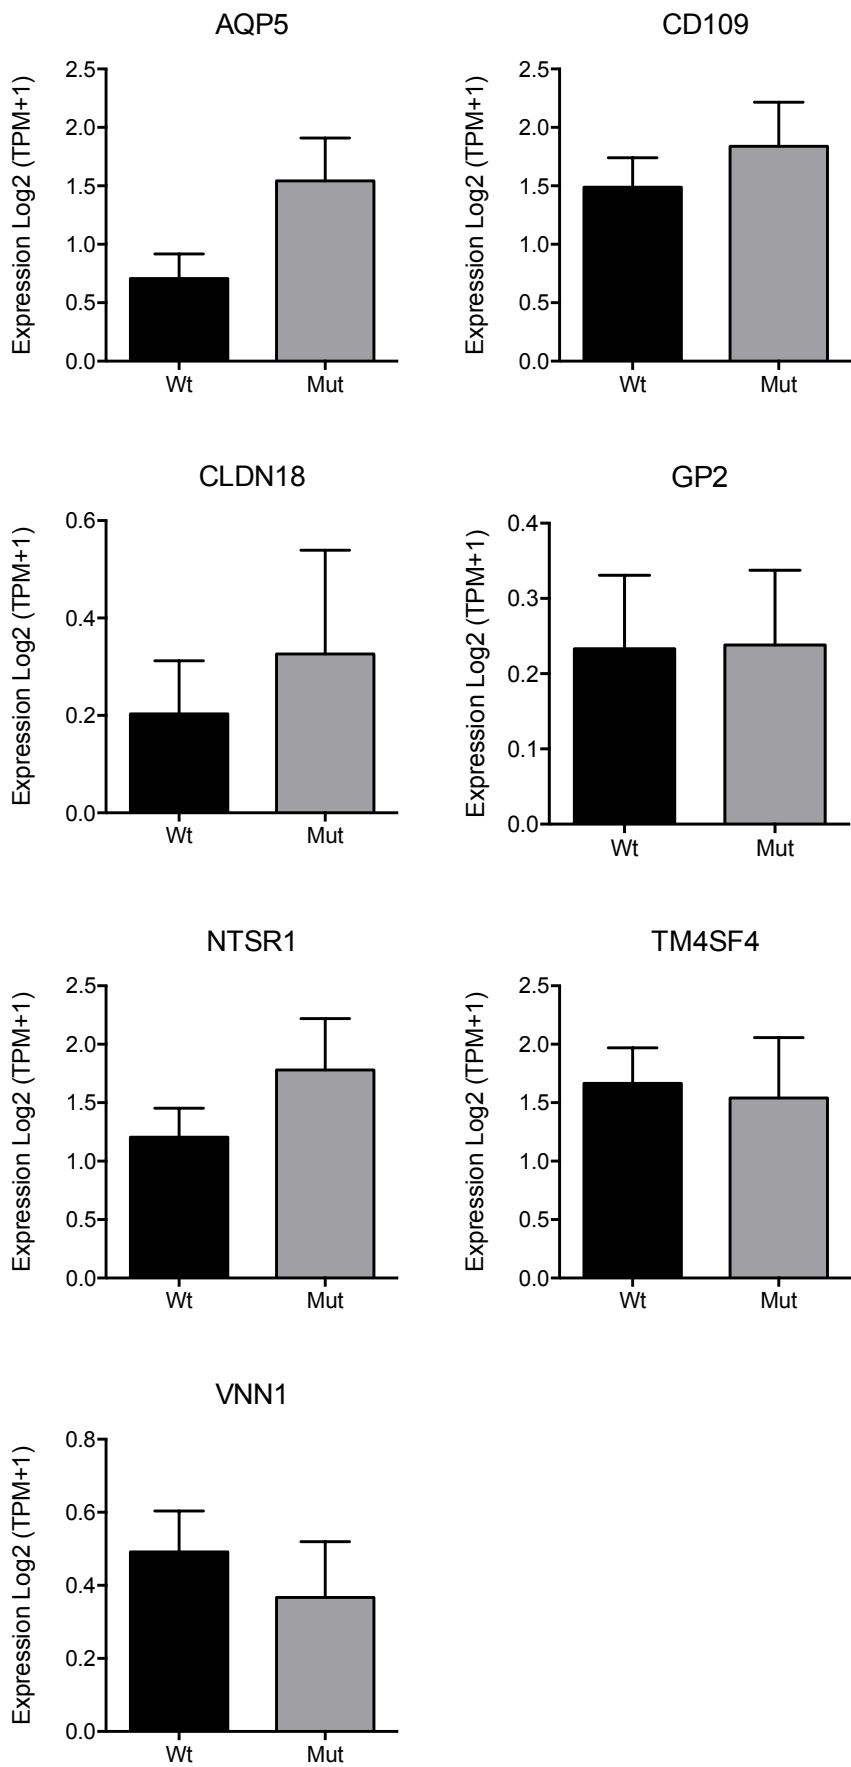

# Supplementary Figure S3

| COAD (n=458)    |                          |                         |                         | READ (n=166)            |                         |                         |
|-----------------|--------------------------|-------------------------|-------------------------|-------------------------|-------------------------|-------------------------|
|                 | T cell CD8+              | T cell CD4+             | DC                      | T cell CD8+             | T cell CD4+             | DC                      |
| <i>CD74</i>     | Rho=0.521<br>p=1.64e-20  | Rho=0.16<br>p=7.94e-03  | Rho=0.717<br>p=1.13e-44 | Rho=0.37<br>p=3.34e-04  | Rho=0.198<br>p=6.09e-02 | Rho=0.497<br>p=6.44e-07 |
| <i>FCGR2B</i>   | Rho=0.398<br>p=7.32e-12  | Rho=0.246<br>p=3.74e-05 | Rho=0.79<br>p=6.07e-60  | Rho=0.36<br>p=4.84e-04  | Rho=0.324<br>p=1.81e-03 | Rho=0.732<br>p=2.36e-16 |
| <i>HLA-DMA</i>  | Rho=0.487<br>p=8.96e-18  | Rho=0.127<br>p=3.48e-02 | Rho=0.672<br>p=1.66e-37 | Rho=0.281<br>p=7.29e-03 | Rho=0.166<br>p=1.18e-01 | Rho=0.416<br>p=4.54e-05 |
| <i>HLA-DMB</i>  | Rho=0.491<br>p=4.11e-18  | Rho=0.152<br>p=1.14e-02 | Rho=0.735<br>p=5.38e-48 | Rho=0.364<br>p=4.14e-04 | Rho=0.232<br>p=2.81e-02 | Rho=0.581<br>p=1.86e-09 |
| <i>HLA-DOA</i>  | Rho=0.458<br>p=1.109e-15 | Rho=0.31<br>p=1.53e-07  | Rho=0.785<br>p=9.37e-59 | Rho=0.393<br>p=1.29e-04 | Rho=0.388<br>p=1.55e-04 | Rho=0.746<br>p=3.19e-17 |
| <i>HLA-DPA1</i> | Rho=0.516<br>p=4.17e-20  | Rho=0.199<br>p=8.95e-04 | Rho=0.798<br>p=6.84e-62 | Rho=0.392<br>p=1.35e-04 | Rho=0.32<br>p=2.09e-03  | Rho=0.698<br>p=1.99e-14 |
| <i>HLA-DPB1</i> | Rho=0.522<br>p=1.26e-20  | Rho=0.234<br>p=9.12e-05 | Rho=0.811<br>p=1.95e-65 | Rho=0.353<br>p=6.41e-04 | Rho=0.379<br>p=2.33e-04 | Rho=0.727<br>p=4.78e-16 |
| <i>HLA-DQA1</i> | Rho=0.435<br>p=4.14e-14  | Rho=0.187<br>p=1.87e-03 | Rho=0.739<br>p=8.52e-49 | Rho=0.306<br>p=3.39e-03 | Rho=0.18<br>p=9.03e-02  | Rho=0.742<br>p=6.23e-17 |
| <i>HLA-DQB1</i> | Rho=0.351<br>p=2.15e-09  | Rho=0.014<br>p=8.2e-01  | Rho=0.551<br>p=3.09e-23 | Rho=0.201<br>p=5.75e-03 | Rho=0.129<br>p=2.24e-01 | Rho=0.638<br>p=1.34e-11 |
| <i>HLA-DRA</i>  | Rho=0.532<br>p=1.83e-21  | Rho=0.139<br>p=2.10e-02 | Rho=0.767<br>p=1.54e-54 | Rho=0.401<br>p=9.16e-05 | Rho=0.212<br>p=4.5e-02  | Rho=0.638<br>p=1.29e-11 |
| <i>HLA-DRB1</i> | Rho=0.474<br>p=7.62e-17  | Rho=0.067<br>p=2.71e-01 | Rho=0.69<br>p=3.77e-40  | Rho=0.299<br>p=4.16e-03 | Rho=0.172<br>p=1.04e-01 | Rho=0.691<br>p=4.6e-14  |
| <i>HLA-DRB5</i> | Rho=0.454<br>p=2.15e-15  | Rho=0.046<br>p=4.47e-01 | Rho=0.631<br>p=5.81e-32 | Rho=0.286<br>p=6.35e-03 | Rho=0.217<br>p=3.96e-02 | Rho=0.682<br>p=1.31e-13 |
| <i>LAG3</i>     | Rho=0.536<br>p=8.00e-22  | Rho=0.173<br>p=4.10e-03 | Rho=0.653<br>p=7.13e-35 | Rho=0.363<br>p=4.30e-04 | Rho=0.262<br>p=1.25e-02 | Rho=0.542<br>p=3.47e-08 |

p<0.005, Rho >0.5

p<0.005, Rho= 0-0.5

p>0.005

p<0.005, Rho= 0-(-0.5)

p<0.005, Rho <-0.5

Supplementary Figure S4

READ (n=166)

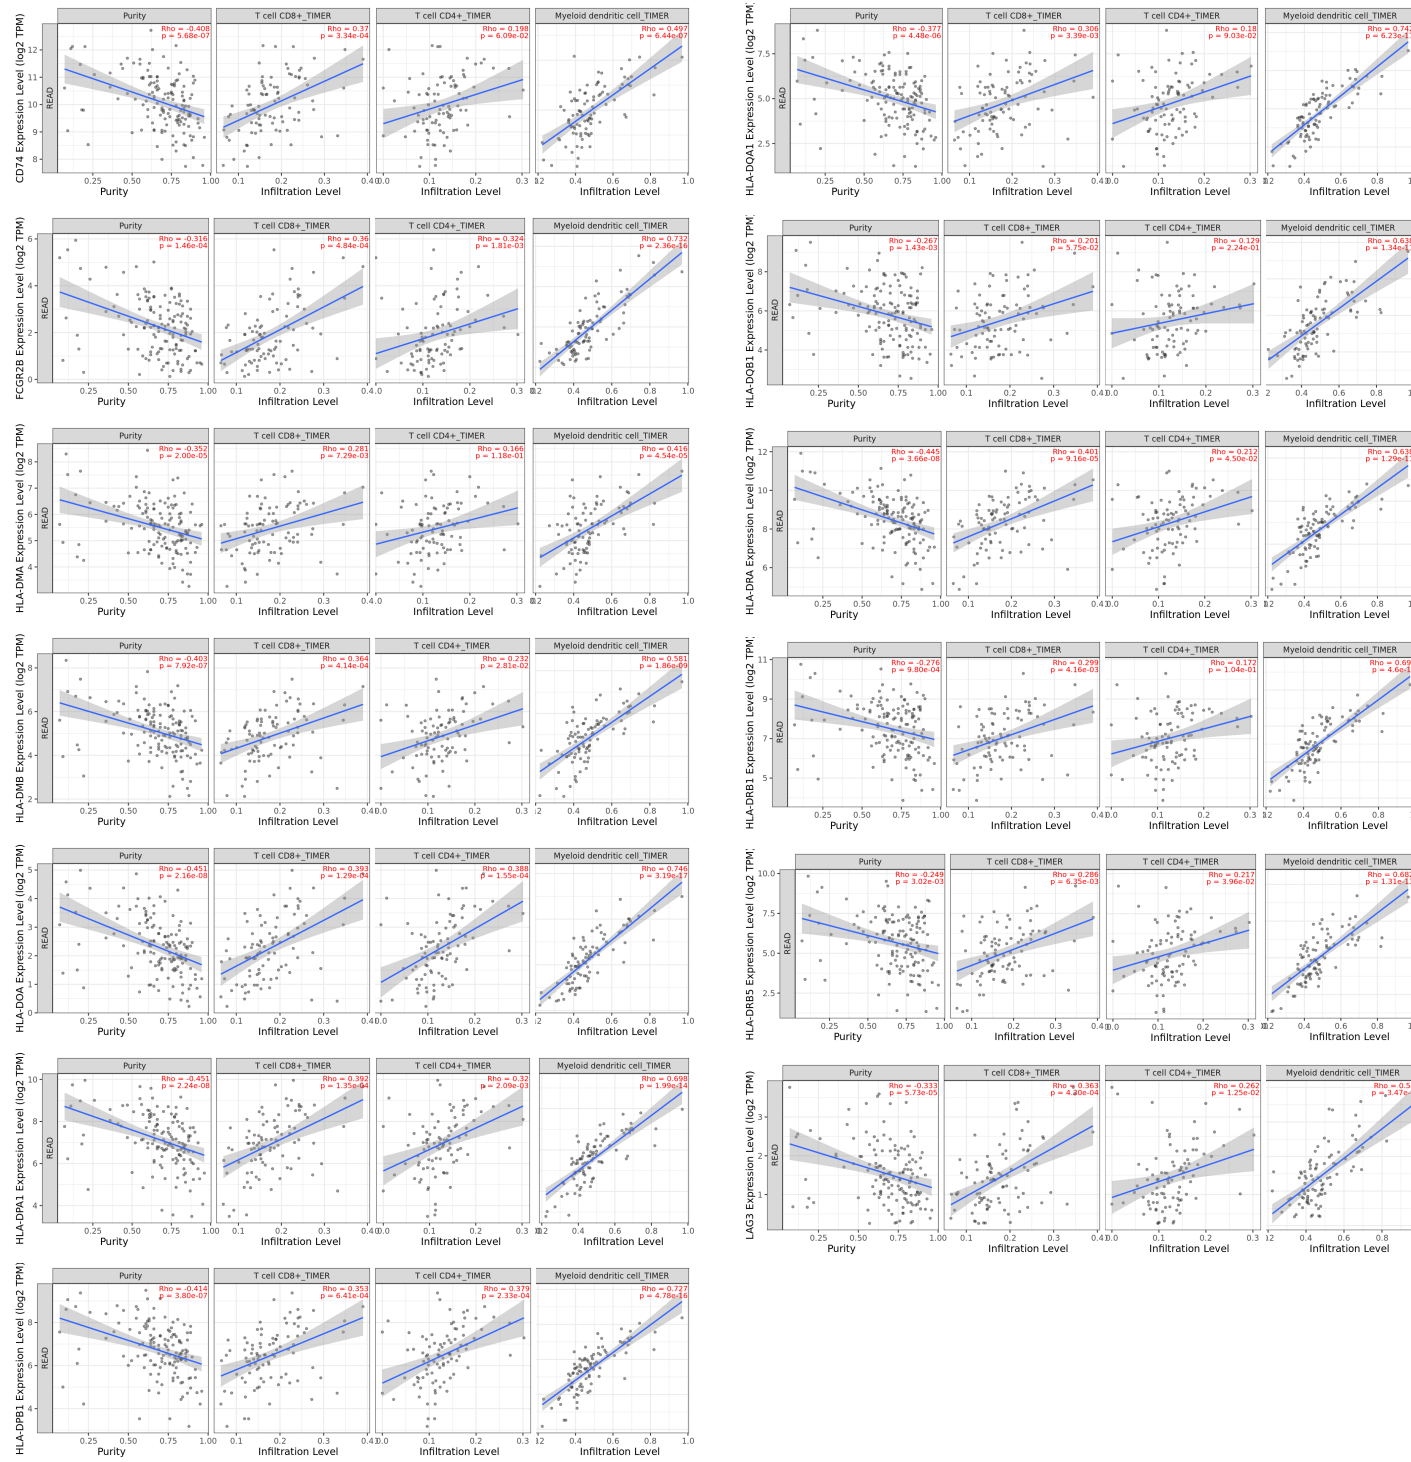

Supplementary Figure S5

| COAD (n=458)    | T cell<br>CD8 <sup>+</sup> | T cell<br>CD4 <sup>+</sup> | DC                      | Macroph.                | MDSCs                    |
|-----------------|----------------------------|----------------------------|-------------------------|-------------------------|--------------------------|
| <i>CD74</i>     | Rho=0.521<br>p=1.64e-20    | Rho=0.16<br>p=7.94e-03     | Rho=0.717<br>p=1.13e-44 | Rho=0.249<br>p=2.88e-05 | Rho=-0.478<br>p=1.37e-24 |
| <i>FCGR2B</i>   | Rho=0.398<br>p=7.32e-12    | Rho=0.246<br>p=3.74e-05    | Rho=0.79<br>p=6.07e-60  | Rho=0.546<br>p=8.65e-23 | Rho=-0.634<br>p=5.15e-47 |
| <i>HLA-DMA</i>  | Rho=0.487<br>p=8.96e-18    | Rho=0.127<br>p=3.48e-02    | Rho=0.672<br>p=1.66e-37 | Rho=0.231<br>p=1.13e-04 | Rho=-0.427<br>p=2.12e-19 |
| <i>HLA-DMB</i>  | Rho=0.491<br>p=4.11e-18    | Rho=0.152<br>p=1.14e-02    | Rho=0.735<br>p=5.38e-48 | Rho=0.311<br>p=1.47e-07 | Rho=-0.542<br>p=2.00e-32 |
| <i>HLA-DOA</i>  | Rho=0.458<br>p=1.109e-15   | Rho=0.31<br>p=1.53e-07     | Rho=0.785<br>p=9.37e-59 | Rho=0.418<br>p=4.41e-13 | Rho=-0.593<br>p=6.29e-40 |
| <i>HLA-DPA1</i> | Rho=0.516<br>p=4.17e-20    | Rho=0.199<br>p=8.95e-04    | Rho=0.798<br>p=6.84e-62 | Rho=0.382<br>p=5.38e-11 | Rho=-0.570<br>p=2.52e-36 |
| <i>HLA-DPB1</i> | Rho=0.522<br>p=1.26e-20    | Rho=0.234<br>p=9.12e-05    | Rho=0.811<br>p=1.95e-65 | Rho=0.428<br>p=1.18e-13 | Rho=-0.647<br>p=1.55e-49 |
| <i>HLA-DQA1</i> | Rho=0.435<br>p=4.14e-14    | Rho=0.187<br>p=1.87e-03    | Rho=0.739<br>p=8.52e-49 | Rho=0.419<br>p=4.27e-13 | Rho=-0.626<br>p=1.40e-45 |
| <i>HLA-DQB1</i> | Rho=0.351<br>p=2.15e-09    | Rho=0.014<br>p=8.2e-01     | Rho=0.551<br>p=3.09e-23 | Rho=0.21<br>p=4.44e-04  | Rho=-0.434<br>p=4.45e-20 |
| <i>HLA-DRA</i>  | Rho=0.532<br>p=1.83e-21    | Rho=0.139<br>p=2.10e-02    | Rho=0.767<br>p=1.54e-54 | Rho=0.303<br>p=2.98e-07 | Rho=-0.536<br>p=1.32e-31 |
| <i>HLA-DRB1</i> | Rho=0.474<br>p=7.62e-17    | Rho=0.067<br>p=2.71e-01    | Rho=0.69<br>p=3.77e-40  | Rho=0.269<br>p=6.25e-06 | Rho=-0.528<br>p=1.70e-30 |
| <i>HLA-DRB5</i> | Rho=0.454<br>p=2.15e-15    | Rho=0.046<br>p=4.47e-01    | Rho=0.631<br>p=5.81e-32 | Rho=0.174<br>p=3.70e-03 | Rho=-0.478<br>p=1.58e-24 |
| <i>LAG3</i>     | Rho=0.536<br>p=8.00e-22    | Rho=0.173<br>p=4.10e-03    | Rho=0.653<br>p=7.13e-35 | Rho=0.194<br>p=1.20e-03 | Rho=-0.403<br>p=2.73e-17 |

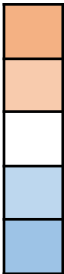

p<0.005, Rho >0.5  
p<0.005, Rho= 0-0.5  
p>0.005  
p<0.005, Rho= 0-(-0.5)  
p<0.005, Rho <-0.5

Supplementary Figure S6

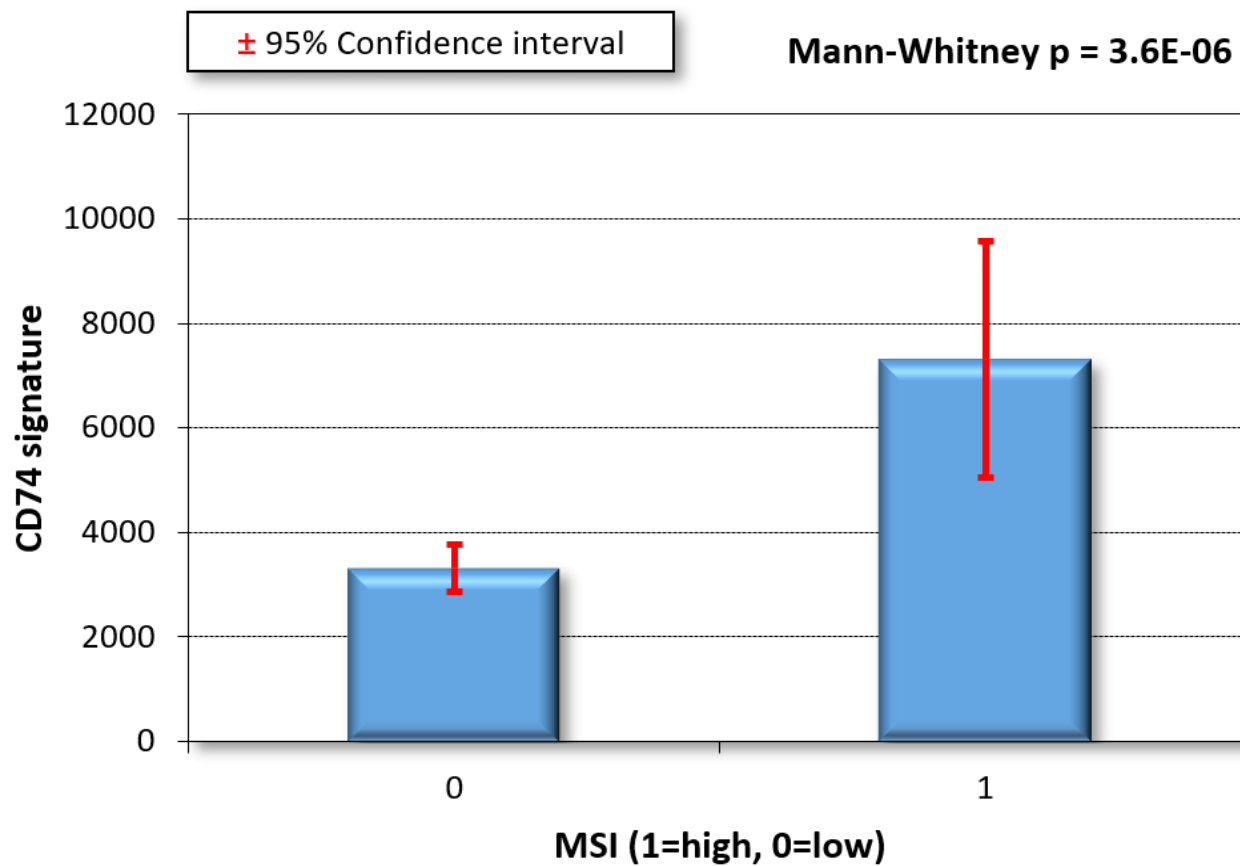

Supplementary Figure S7

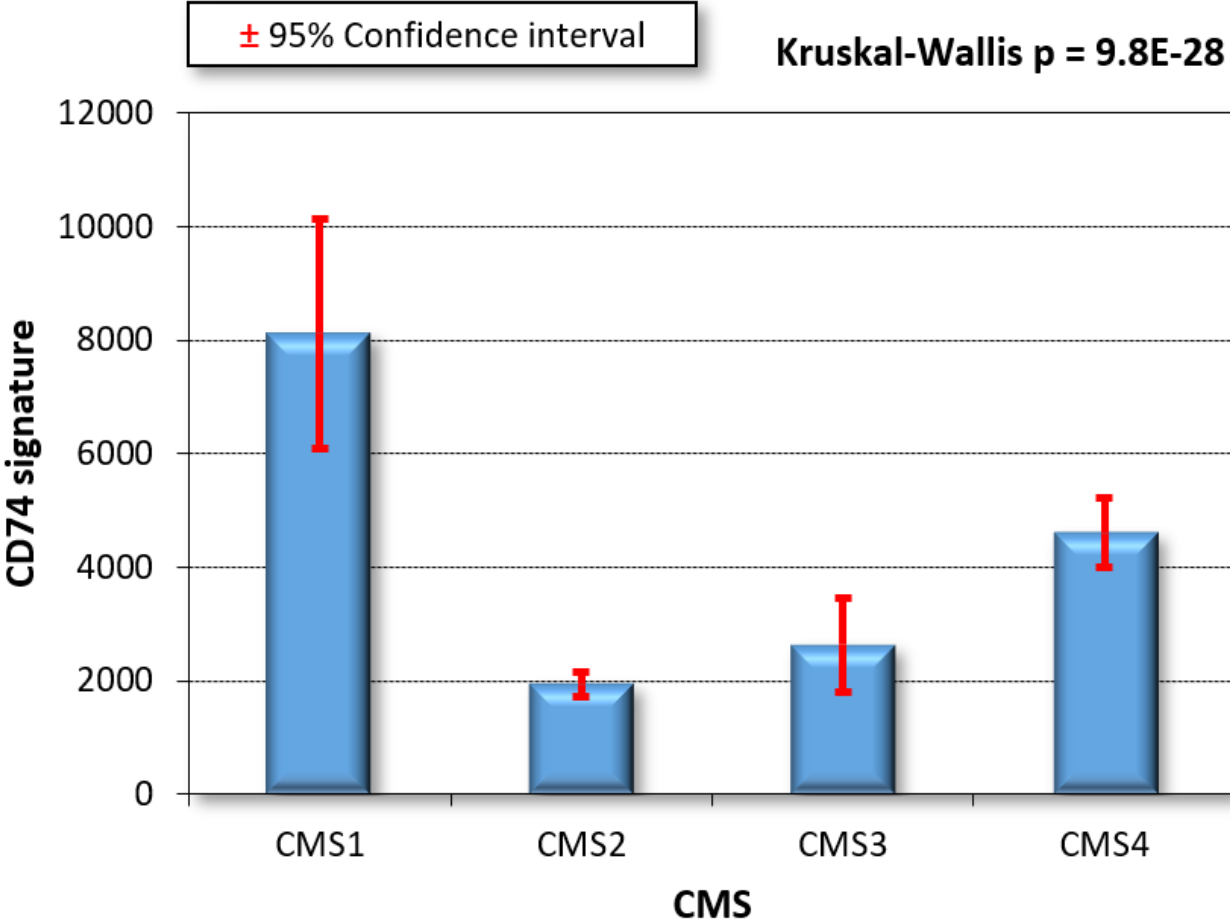

## Supplementary Figure S8

**A**

COAD (n=458)

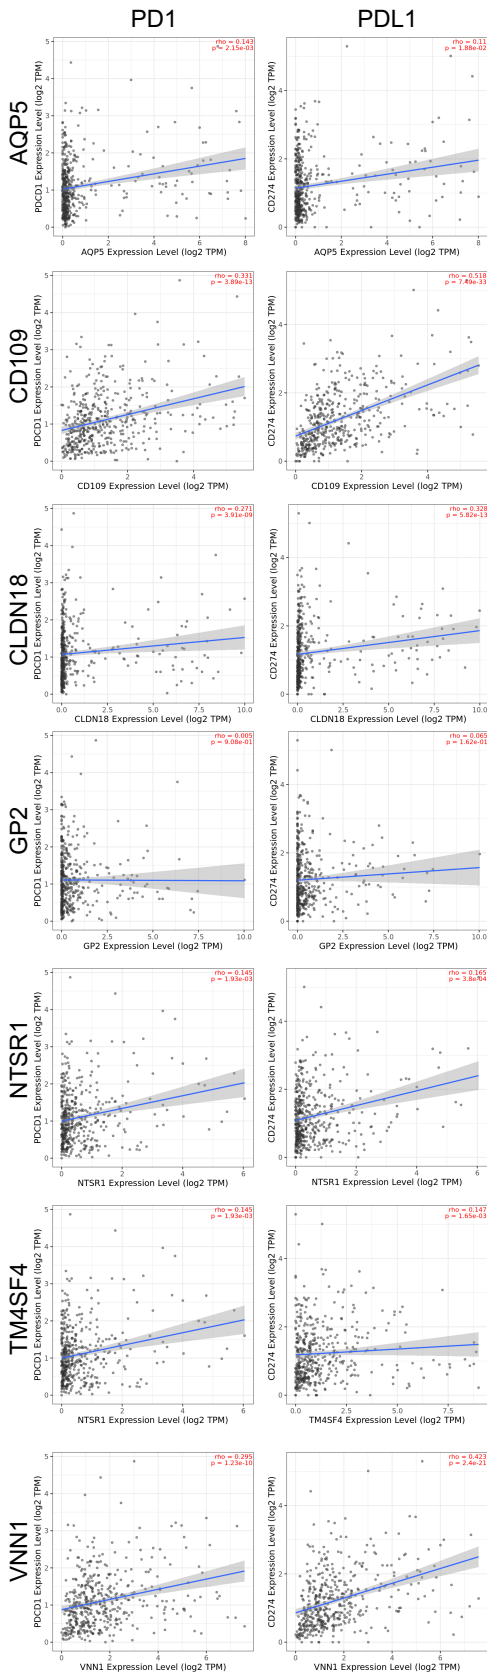

# B

READ (n=166)

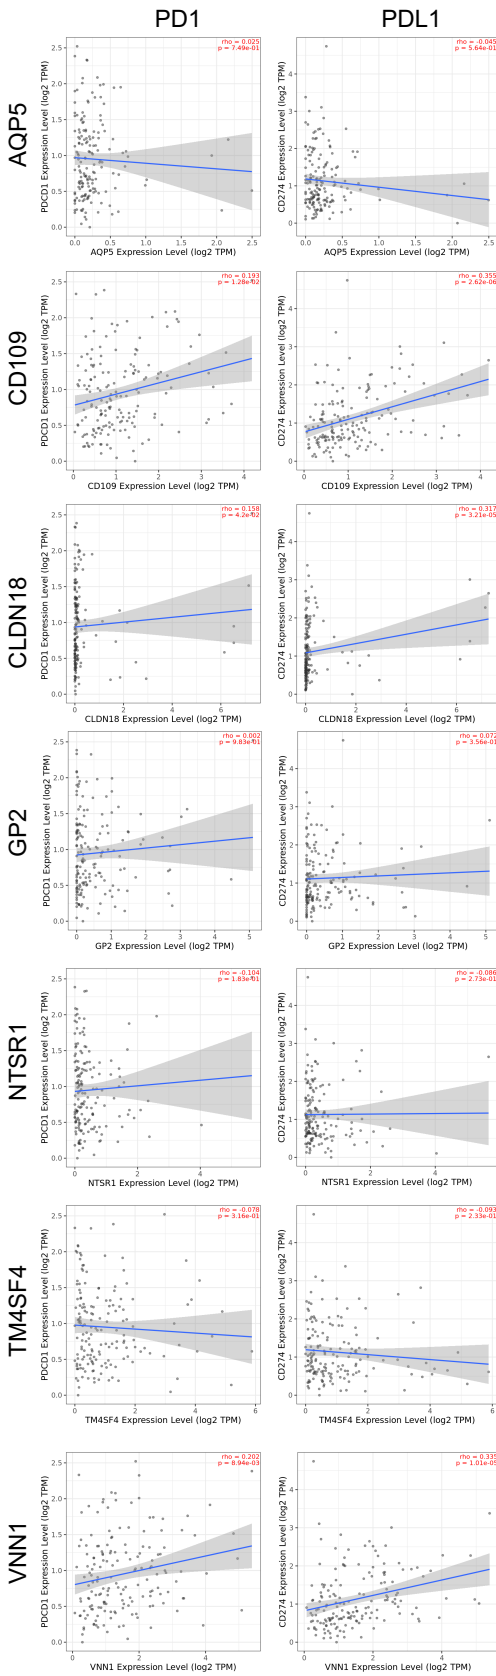



Supplementary Figure S9

| COAD (n=458)  |                         |                          |                          |                          |                          |
|---------------|-------------------------|--------------------------|--------------------------|--------------------------|--------------------------|
|               | T cell CD8+             | T cell CD4+              | DC                       | Macroph.                 | MDSCs                    |
| <i>AQP5</i>   | Rho=0.152<br>p=1.14e-2  | Rho=-0.058<br>p=3.34e-01 | Rho=0.117<br>p=5.26e-02  | Rho=-0.08<br>p=1.86e-01  | Rho=0.09<br>p=6.86e-02   |
| <i>CD109</i>  | Rho=0.319<br>p=6.32e-08 | Rho=0.185<br>p=2.08e-03  | Rho=0.617<br>p=3.22e-30  | Rho=0.45<br>p=3.78e-15   | Rho=-0.101<br>p=4.10e-02 |
| <i>CLDN18</i> | Rho=0.321<br>p=5.09e-08 | Rho=-0.019<br>p=7.49e-01 | Rho=0.319<br>p=6.33e-08  | Rho=0.018<br>p=7.66e-01  | Rho=-0.082<br>p=9.86e-02 |
| <i>GP2</i>    | Rho=0.045<br>p=4.55e-01 | Rho=-0.065<br>p=2.86e-01 | Rho=-0.069<br>p=2.52e-01 | Rho=-0.06<br>p=3.22e-01  | Rho=-0.026<br>p=6.07e-01 |
| <i>NTSR1</i>  | Rho=0.159<br>p=8.12e-03 | Rho=0.054<br>p=3.69e-01  | Rho=0.244<br>p=4.30e-05  | Rho=0.216<br>p=3.06e-04  | Rho=-0<br>p=9.97e-01     |
| <i>TM4SF4</i> | Rho=0.206<br>p=6.01e-04 | Rho=0.199<br>p=8.95e-04  | Rho=0.16<br>p=8.00e-03   | Rho=0.06<br>p=3.21e-01   | Rho=-0.086<br>p=8.25e-02 |
| <i>VNN1</i>   | Rho=0.378<br>p=9.16e-11 | Rho=-0.105<br>p=8.20e-02 | Rho=0.32<br>p=5.97e-08   | Rho=-0.006<br>p=9.21e-01 | Rho=-0.247<br>p=4.90e-07 |

| READ (n=166)              |                          |                          |                          |                          |
|---------------------------|--------------------------|--------------------------|--------------------------|--------------------------|
| T cell CD8+               | T cell CD4+              | DC                       | Macroph.                 | MDSCs                    |
| Rho=-0.204<br>p=5.41e-02  | Rho=0.12<br>p=2.60e-01   | Rho=-0.274<br>p=9.07e-03 | Rho=0.028<br>p=7.96e-01  | Rho=0.139<br>p=1.03e-01  |
| Rho=0.278<br>p=8.02e-03   | Rho=0.404<br>p=7.84e-05  | Rho=0.53<br>p=7.65e-08   | Rho=0.446<br>p=1.06e-05  | Rho=0.054<br>p=5.24e-01  |
| Rho=0.021<br>p=8.46e-01   | Rho=0.019<br>p=2.62e-01  | Rho=0.035<br>p=7.41e-01  | Rho=0.057<br>p=5.94e-01  | Rho=0.03<br>p=7.29e-01   |
| Rho=-0.056<br>p=5.99e-01  | Rho=-0.085<br>p=4.24e-01 | Rho=-0.067<br>p=5.31e-01 | Rho=-0.059<br>p=5.81e-01 | Rho=-0.105<br>p=2.17e-01 |
| Rho=-0.009<br>p=9.31e-01  | Rho=0.012<br>p=9.08e-01  | Rho=-0.089<br>p=4.05e-01 | Rho=0.008<br>p=9.38e-01  | Rho=-0.079<br>p=3.54e-01 |
| Rho=-0.054<br>p=-6.12e-01 | Rho=0.32<br>p=2.09e-03   | Rho=0.16<br>p=8.84e-01   | Rho=0.116<br>p=2.77e-01  | Rho=-0.006<br>p=9.45e-01 |
| Rho=0.239<br>p=2.31e-02   | Rho=0.067<br>p=5.31e-01  | Rho=0.171<br>p=1.08e-01  | Rho=0.168<br>p=1.14e-01  | Rho=-0.347<br>p=2.85e-05 |

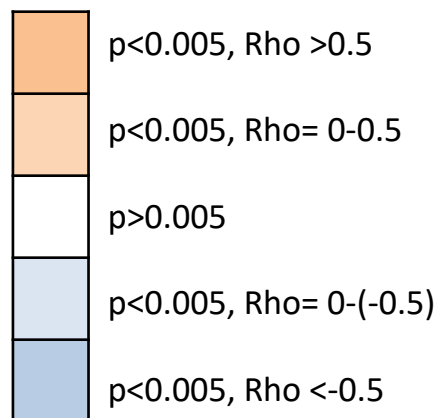

Supplementary Figure S10

|                                         | CD74<br>signature | AQP5<br>signature |
|-----------------------------------------|-------------------|-------------------|
| <b>Number of Immunogenic Mutation</b>   |                   |                   |
| Correlation coefficient                 | 0.233             | 0.219             |
| Valid cases                             | 390               | 390               |
| One-sided significance                  | 1.6E-6            | 6.3E-06           |
| <b>Number of Binding Expressed PMHC</b> |                   |                   |
| Correlation coefficient                 | 0.267             | 0.244             |
| Valid cases                             | 390               | 390               |
| One-sided significance                  | 4.1E-08           | 5.3E-07           |
| <b>Total Number of Mutations</b>        |                   |                   |
| Correlation coefficient                 | 0.193             | 0.230             |
| Valid cases                             | 412               | 412               |
| One-sided significance                  | 3.9E-05           | 1.1E-06           |
